# Supplementary material for: Misreporting Month of Birth: Diagnosis and Implications for Research on Nutrition and Early Childhood in Developing Countries
Source: Springer Nature journal article supplement (doi:10.1007/s13524-018-0753-9), 2019-01-28
Supplement: MOESM1 [file 16426130]

## Online Appendix

This document includes supplementary material for

### **Misreporting Month of Birth: Diagnosis and Implications for Research on Nutrition and Early Childhood in Developing Countries**

by

Anna Folke Larsen, Derek Headey and William A. Masters

Published in Demography

## **A: Supplementary results**

**Table A.1 Sample sizes for anthropometric data by region for 62 countries**

| <b>Region</b>                | <b>Countries</b> | <b>Child observations</b> | <b>Frequency</b> |
|------------------------------|------------------|---------------------------|------------------|
| East Asia and Pacific        | 2                | 19,447                    | 2.0%             |
| Europe and Central Asia      | 7                | 18,653                    | 1.9%             |
| Latin America and Caribbean  | 10               | 222,255                   | 22.4%            |
| Middle East and North Africa | 5                | 145,081                   | 14.7%            |
| South Asia                   | 5                | 98,260                    | 9.9%             |
| Africa south of the Sahara   | 33               | 486,535                   | 49.1%            |
| Total                        | 62               | 990,231                   | 100.0%           |

Source: ICF International (2015).

**Figure A.1 HAZ by MOB for children with and without imputed birth month**

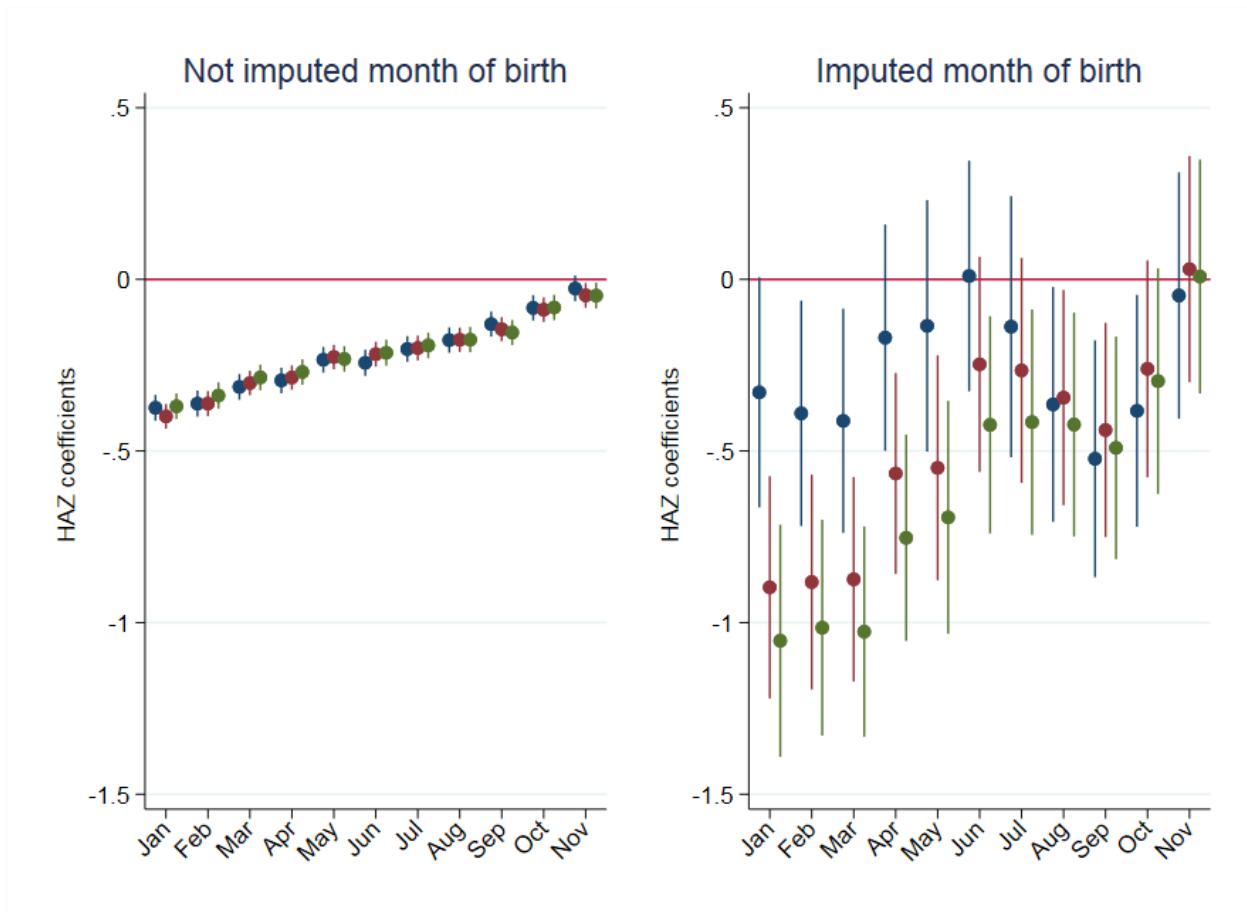

Source: DHS data from 396,299 children in 17 countries in Africa south of the Sahara and Egypt and India.

Note: HAZ = height-for-age z-scores; MOB = month of birth. Two percent of children have imputed month of birth. The graphs present coefficients to MOB dummies from three regressions: raw means (in blue); controlling for child demographics and survey fixed effects (red); and also controlling for parental and household characteristics (green). Regression results are available upon request.

**Figure A.2 Number of births by MOB**

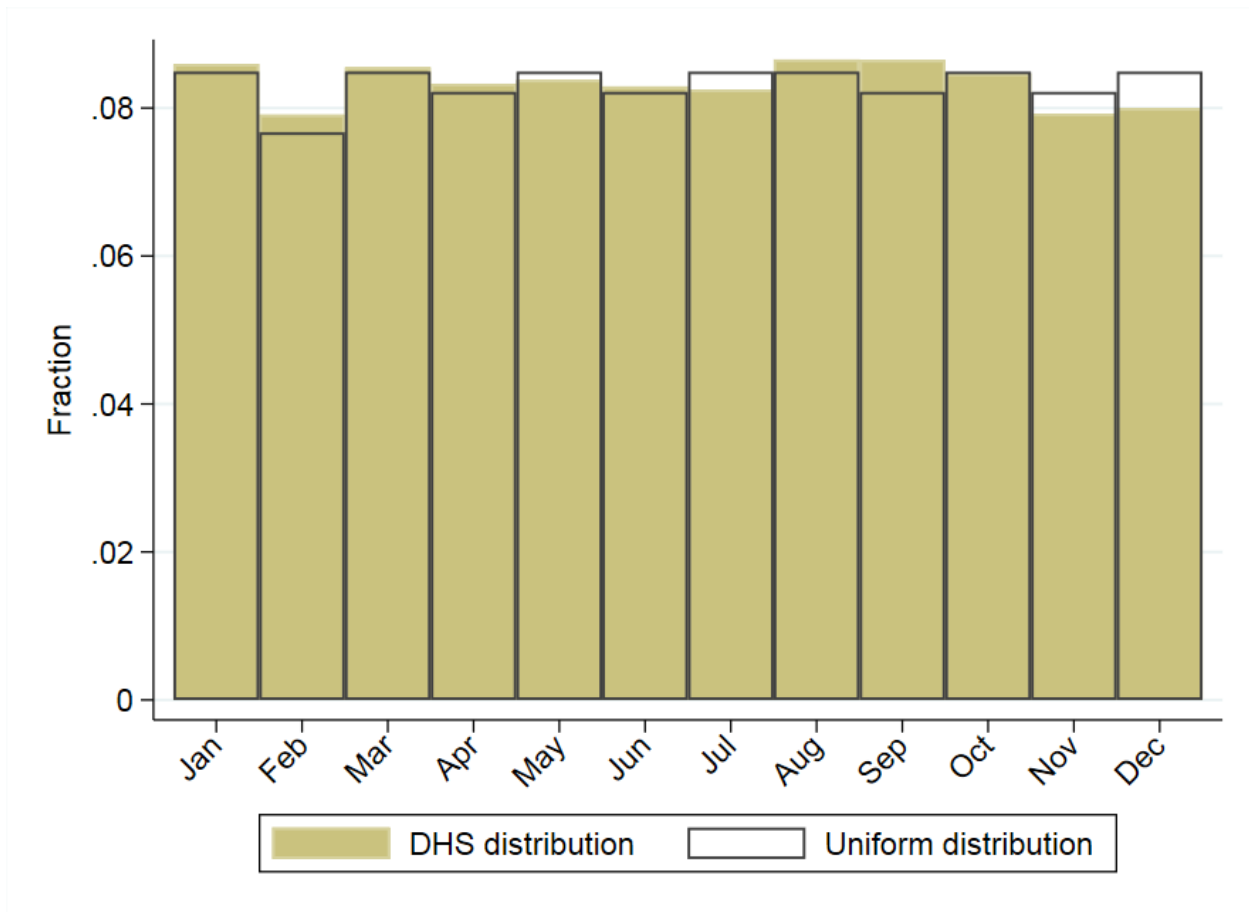

Source: DHS data from 990,231 children in 62 countries, various years.

Note: DHS = Demographic Health Surveys. The uniform distribution illustrates the distribution of birth months when birthdays are reported with equal probability for all days of the year.

Figure A.3 Weight-for-Age Z-score (WAZ) and Weight-for-Height Z-score (WHZ) by MOB

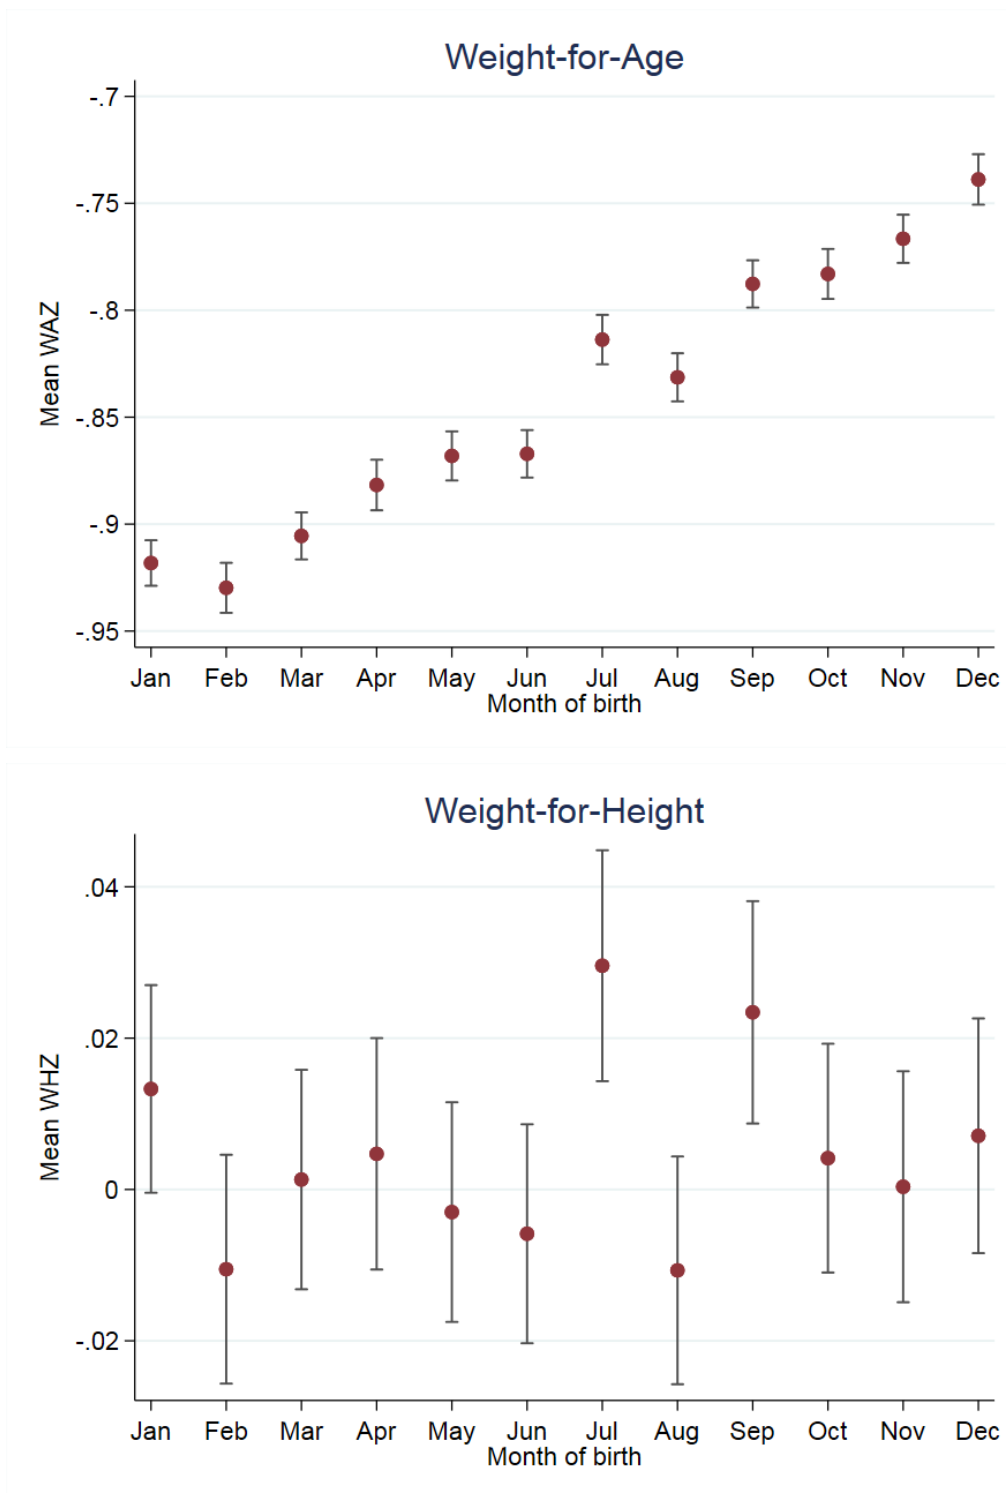

Source: DHS data from 982,666 (WAZ) and 976,278 (WHZ) children in 62 countries, various years.

Figure A.4 Mother's education in years by months in addition to age in years

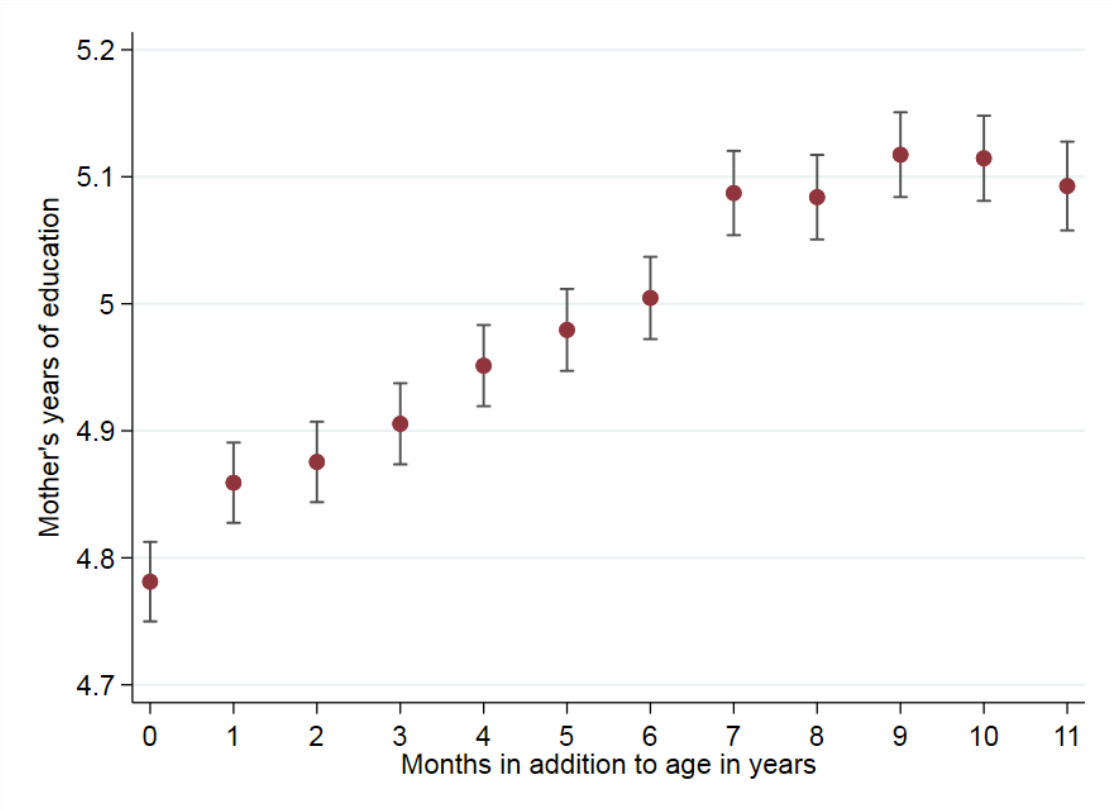

Source: DHS data from 975,534 children in 62 countries, various years.

**Figure A.5 HAZ–MOB gradients for major regions and selected countries with controls**

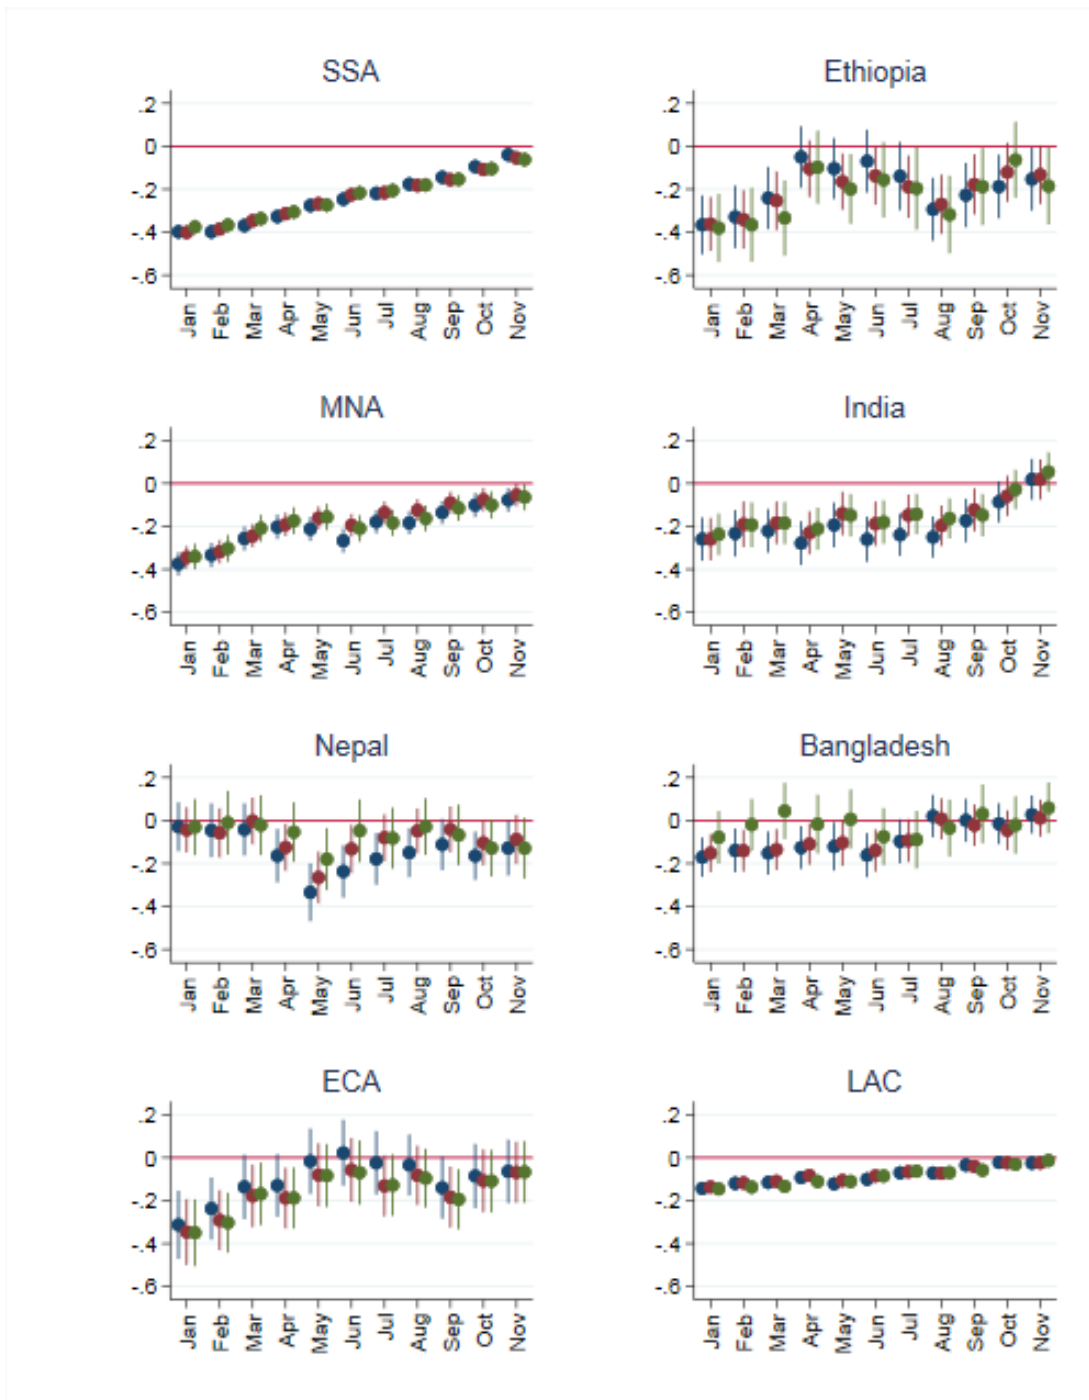

Source: DHS data for 960,012 children from 58 countries, various years.

Note: HAZ = height-for-age z-scores; SSA = Africa south of the Sahara; MNA = Middle East and North Africa; MOB = month of birth; ECA = Eastern Europe and Central Asia; LAC = Latin America and Caribbean. The graphs present coefficients to MOB dummies from three regressions: raw means (in blue); controlling for child demographics and survey fixed effects (red); and also controlling for parental and household characteristics (green). Regression results are available upon request.

**Figure A.6 HAZ by MOB depending on the mother's education**

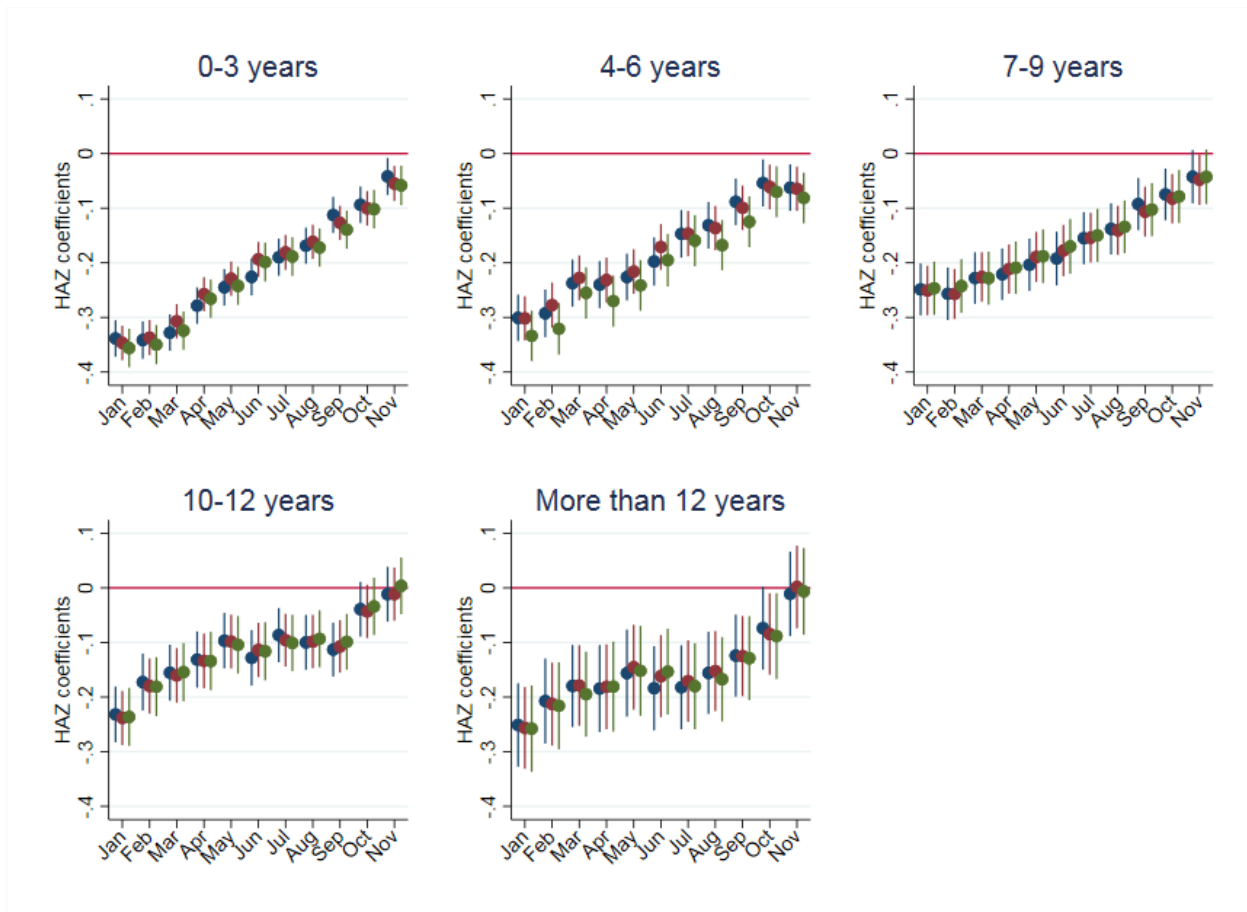

Source: DHS data from 975,534 children in 62 countries.

Note: HAZ = height-for-age z-scores; MOB = month of birth. Forty-four percent of children have mothers with 0–3 years of schooling; 19 percent have mothers with 4–6 years of schooling; 16 percent have mothers with 7–9 years of schooling; 14 percent have mothers with 10–12 years of schooling, and 6 percent have mothers with 13 or more years of schooling. The graphs present coefficients to MOB dummies from three regressions: raw means (in blue); controlling for child demographics and survey fixed effects (red); and also controlling for parental and household characteristics (green). Regression results are available upon request.

**Figure A.7 HAZ by MOB depending on the mother's literacy**

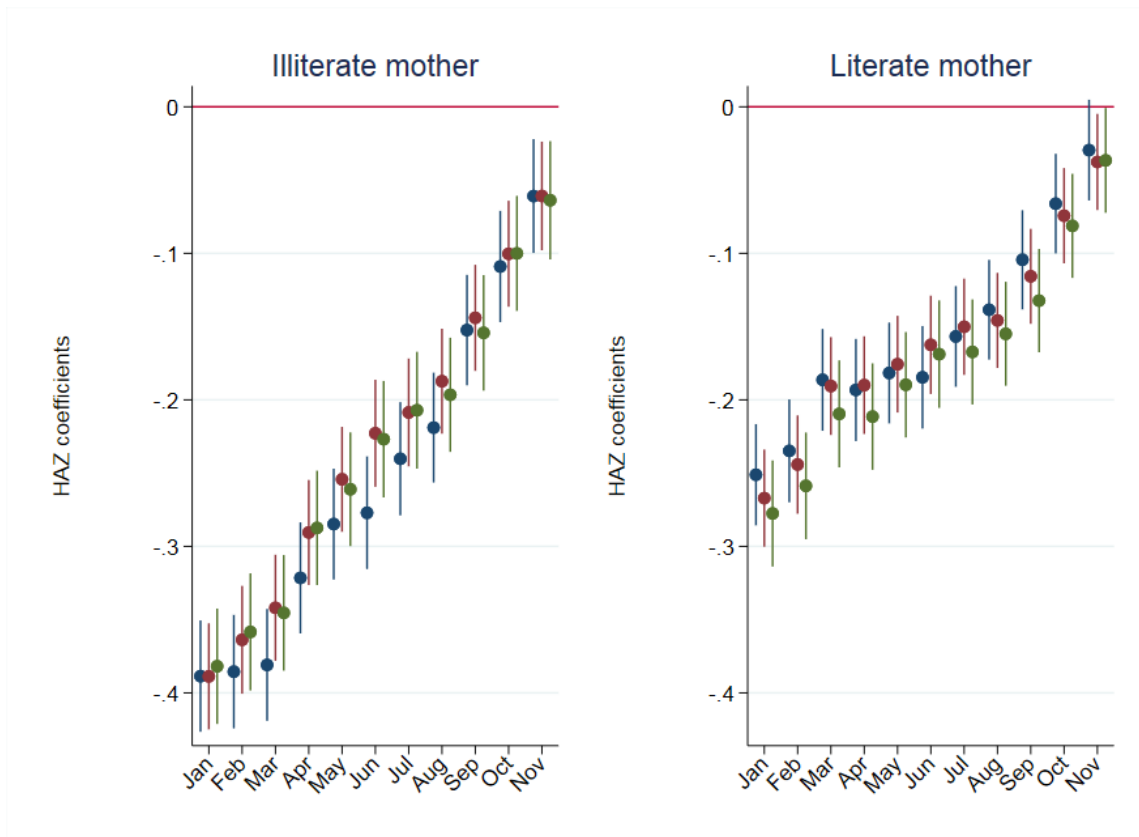

Source: DHS data from 395,347 children in 50 countries, various years.

Note: HAZ = height-for-age z-scores; MOB = month of birth. Fifty-three percent of the children have illiterate mothers; 47 percent have literate mothers. The graphs present coefficients to MOB dummies from three regressions: raw means (in blue); controlling for child demographics and survey fixed effects (red); and also controlling for parental and household characteristics (green). Regression results are available upon request.



**Figure A.8 HAZ by MOB depending on whether the mother has shown the child's birth certificate**

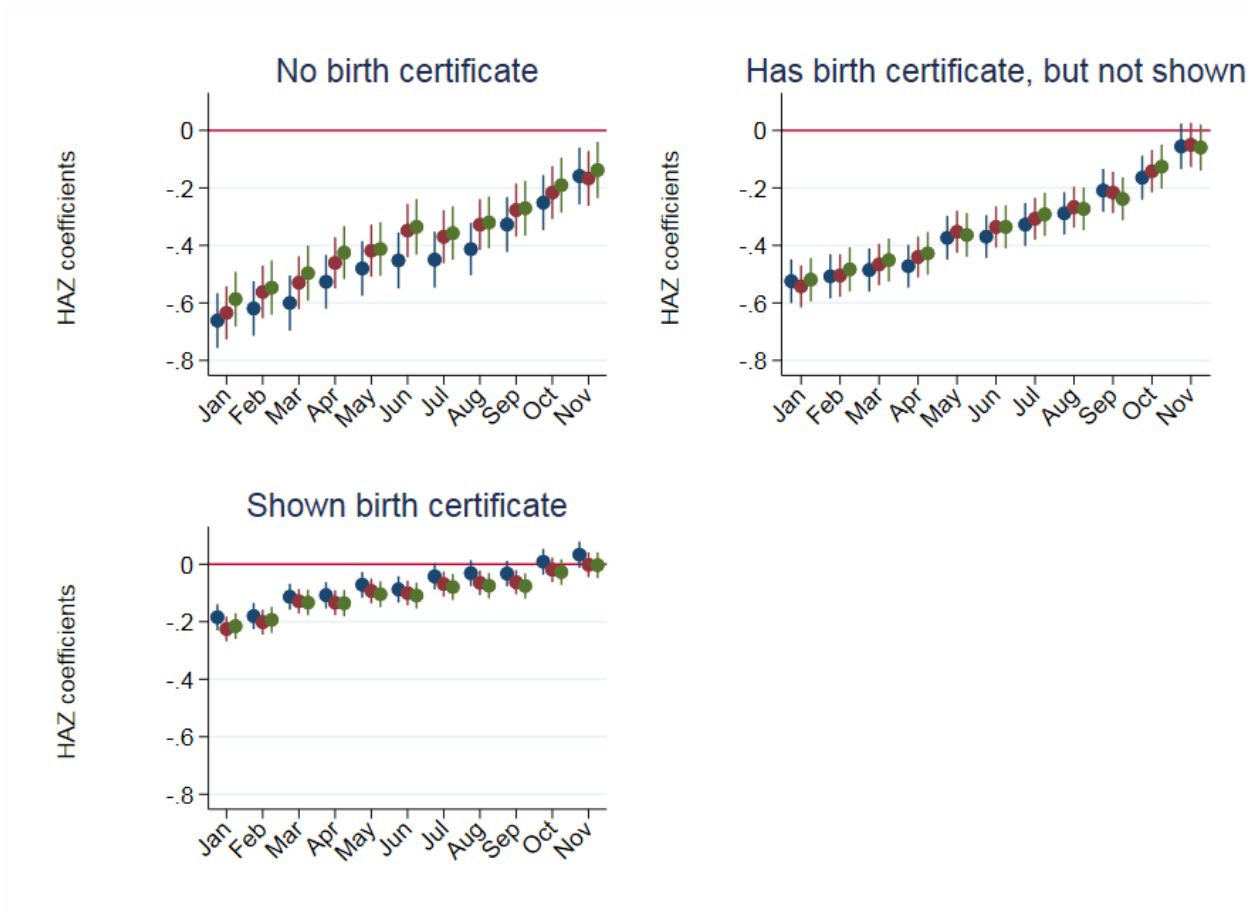

Source: DHS data from 396,299 children from 17 countries in Africa south of the Sahara and Egypt and India.

Note: HAZ = height-for-age z-scores; MOB = month of birth. Twenty-one percent of children have no birth certificate; 26 percent have a birth certificate but it is not shown to the enumerator; and 53 percent show the birth certificate. The graphs present coefficients to MOB dummies from three regressions: raw means (in blue); controlling for child demographics and survey fixed effects (red); and also controlling for parental and household characteristics (green). Regression results are available upon request.

**Figure A.9 HAZ by MOB by age group**

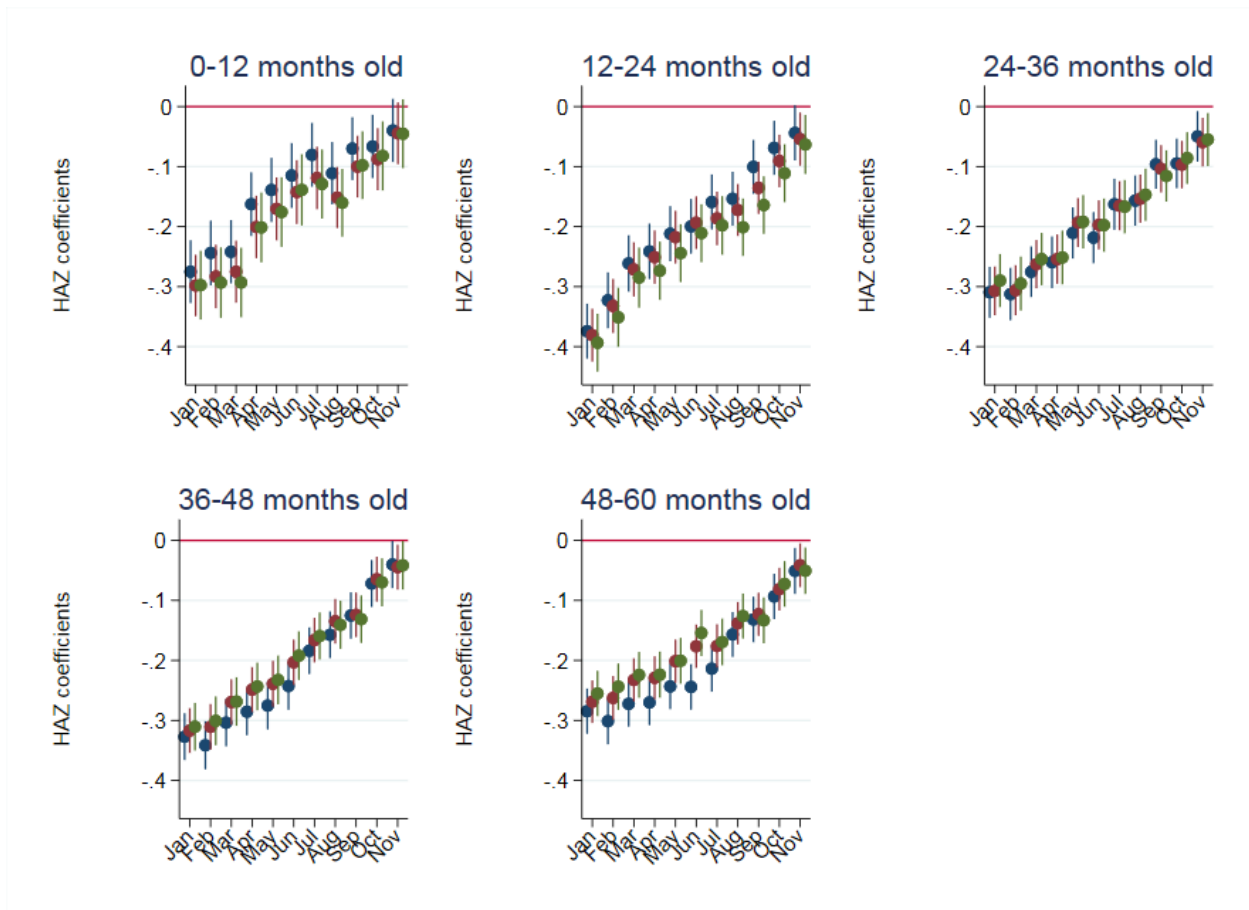

Source: DHS data from 990,231 children in 62 countries, various years.

Note: HAZ = height-for-age z-scores; MOB = month of birth. The graphs present coefficients to MOB dummies from three regressions: raw means (in blue); controlling for child demographics and survey fixed effects (red); and also controlling for parental and household characteristics (green). Regression results are available upon request.

**Figure A.10 HAZ by MOB by gender of the child**

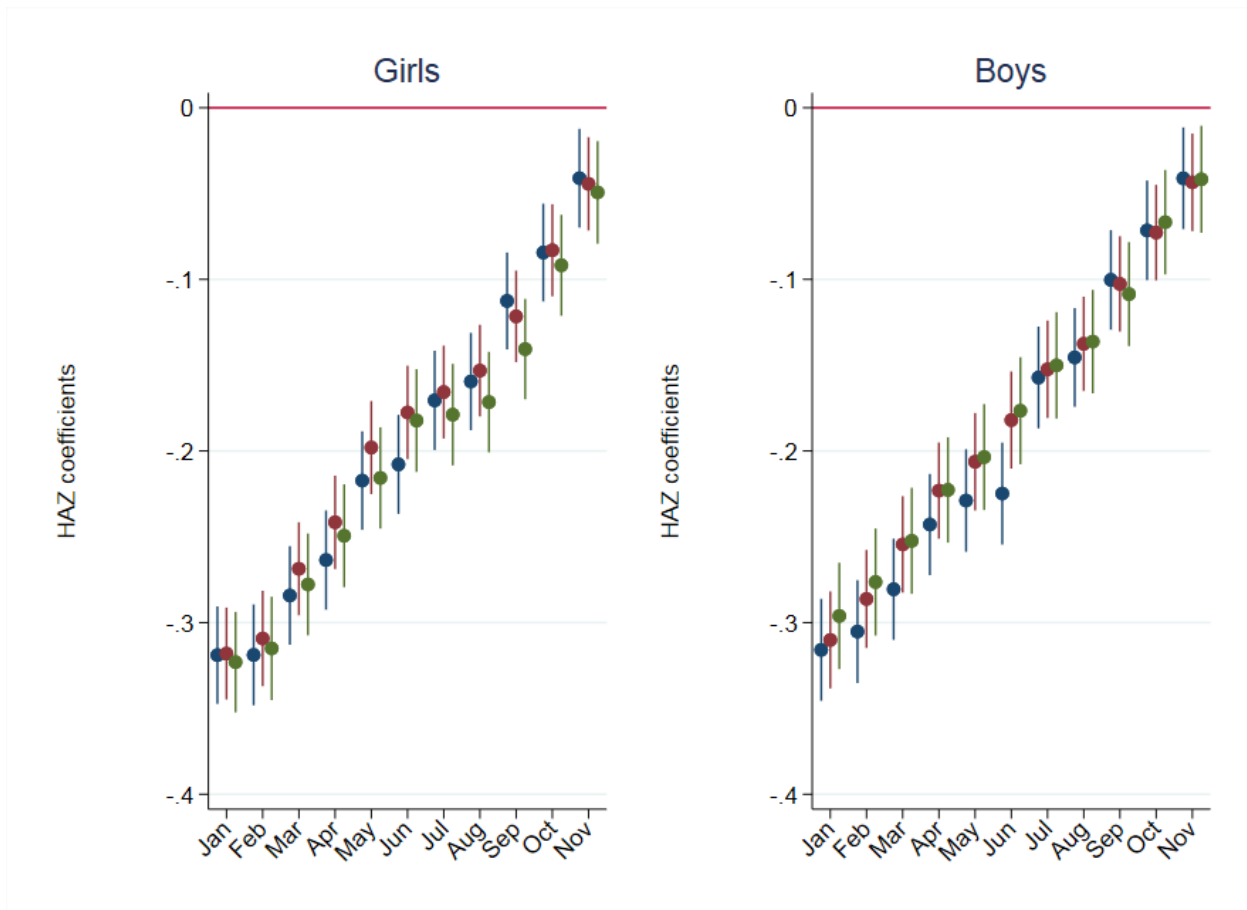

Source: DHS data from 990,231 children in 62 countries.

Note: HAZ = height-for-age z-scores; MOB = month of birth. Fifty-one percent of the children are boys. The graphs present coefficients to MOB dummies from three regressions: raw means (in blue); controlling for child demographics and survey fixed effects (red); and also controlling for parental and household characteristics (green). Regression results are available upon request.

**Figure A.11 HAZ by MOB by number of children in the household**

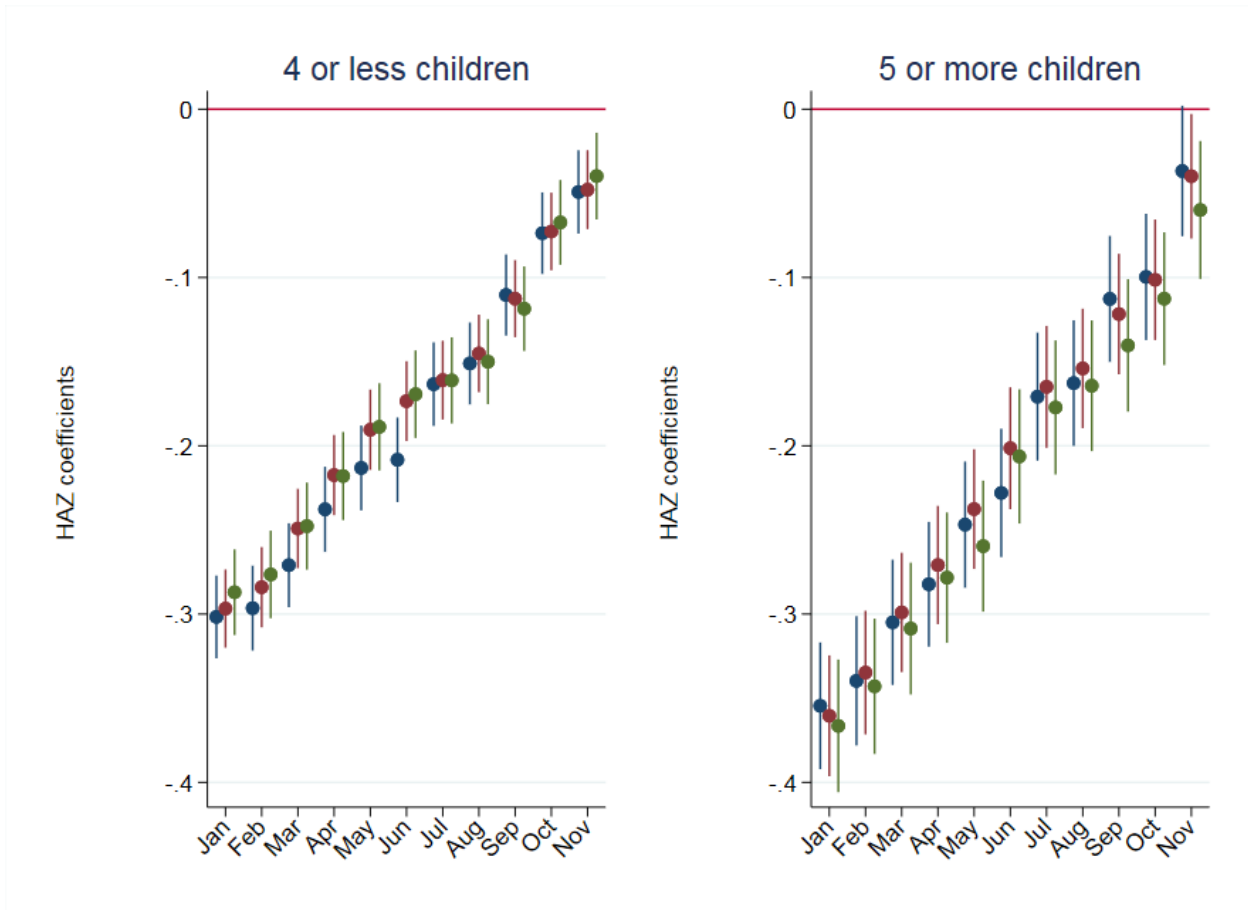

Source: DHS data from 990,231 children in 62 countries.

Note: HAZ = height-for-age z-scores; MOB = month of birth. Sixty-nine percent of children have three or fewer siblings on their mother's side. The graphs present coefficients to MOB dummies from three regressions: raw means (in blue); controlling for child demographics and survey fixed effects (red); and also controlling for parental and household characteristics (green). Regression results are available upon request.

**Figure A.12 HAZ by MOB by location of the household**

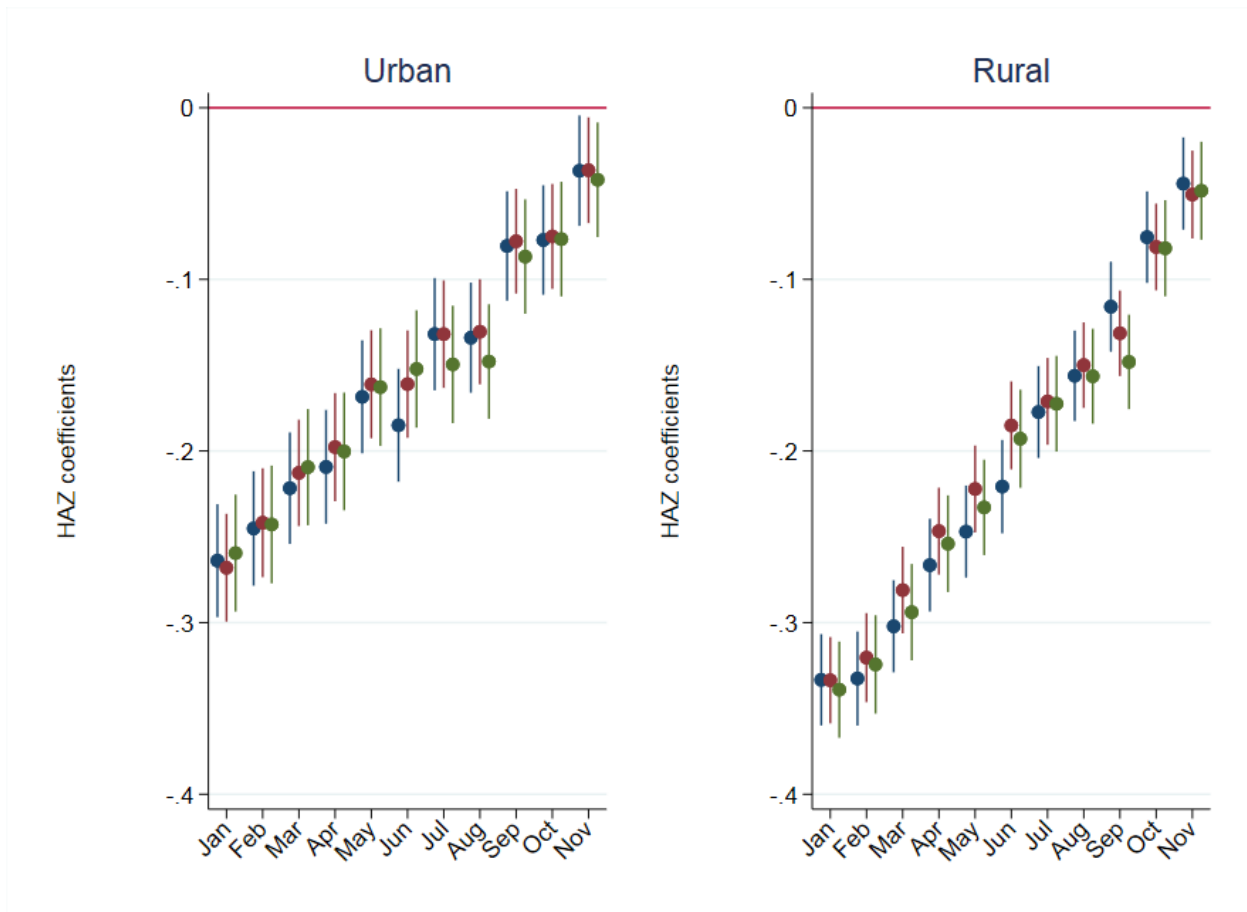

Source: DHS data from 990,231 children in 62 countries.

Note: HAZ = height-for-age z-scores; MOB = month of birth. Thirty-six percent of children live in urban households. The graphs present coefficients to MOB dummies from three regressions: raw means (in blue); controlling for child demographics and survey fixed effects (red); and also controlling for parental and household characteristics (green). Regression results are available upon request.

**Figure A.13 HAZ by MOB depending on whether the household has above or below median assets**

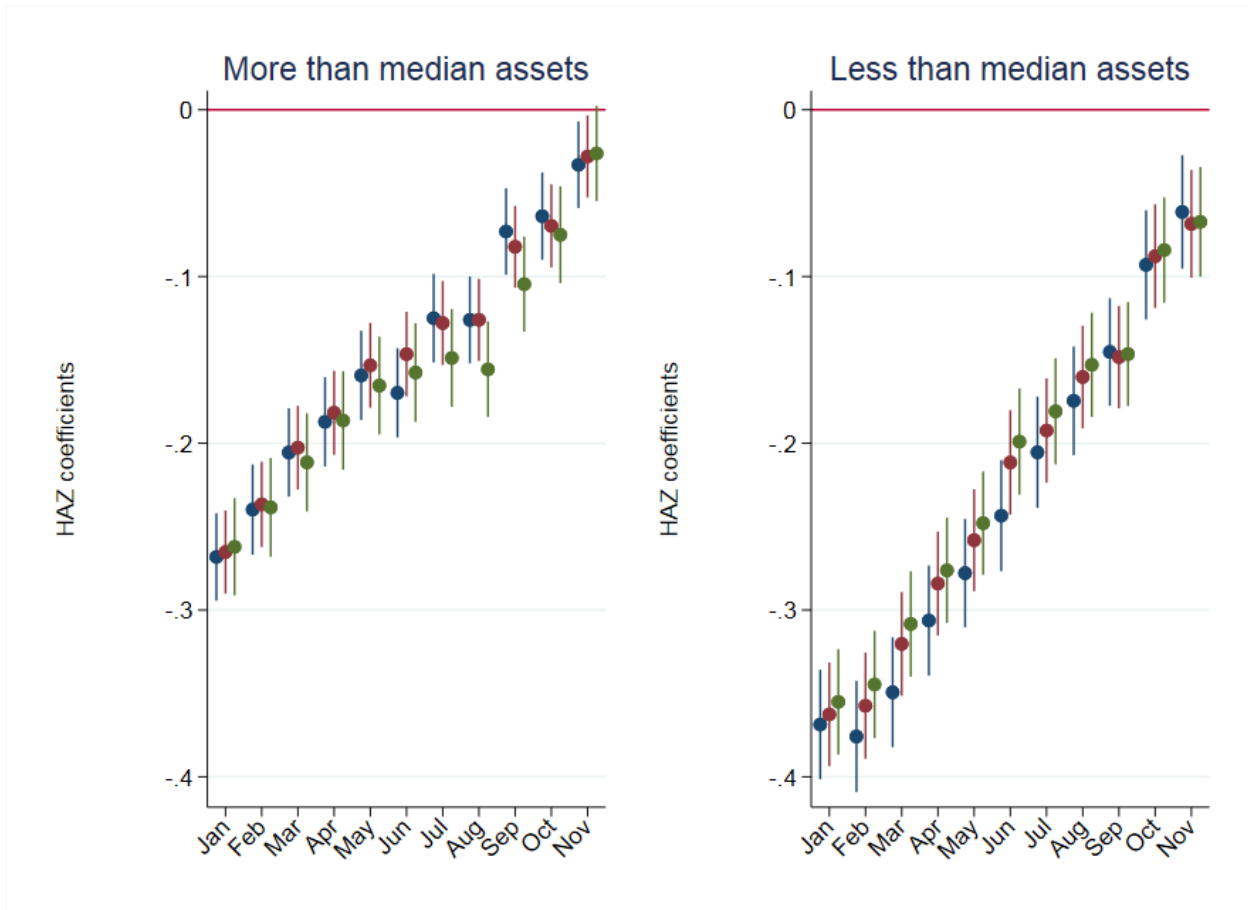

Source: DHS data from 866,450 children in 59 countries.

Note: HAZ = height-for-age z-scores; MOB = month of birth. The graphs present coefficients to MOB dummies from three regressions: raw means (in blue); controlling for child demographics and survey fixed effects (red); and also controlling for parental and household characteristics (green). Regression results are available upon request.

**Figure A.14 HAZ by additional months for major regions and selected countries including controls**

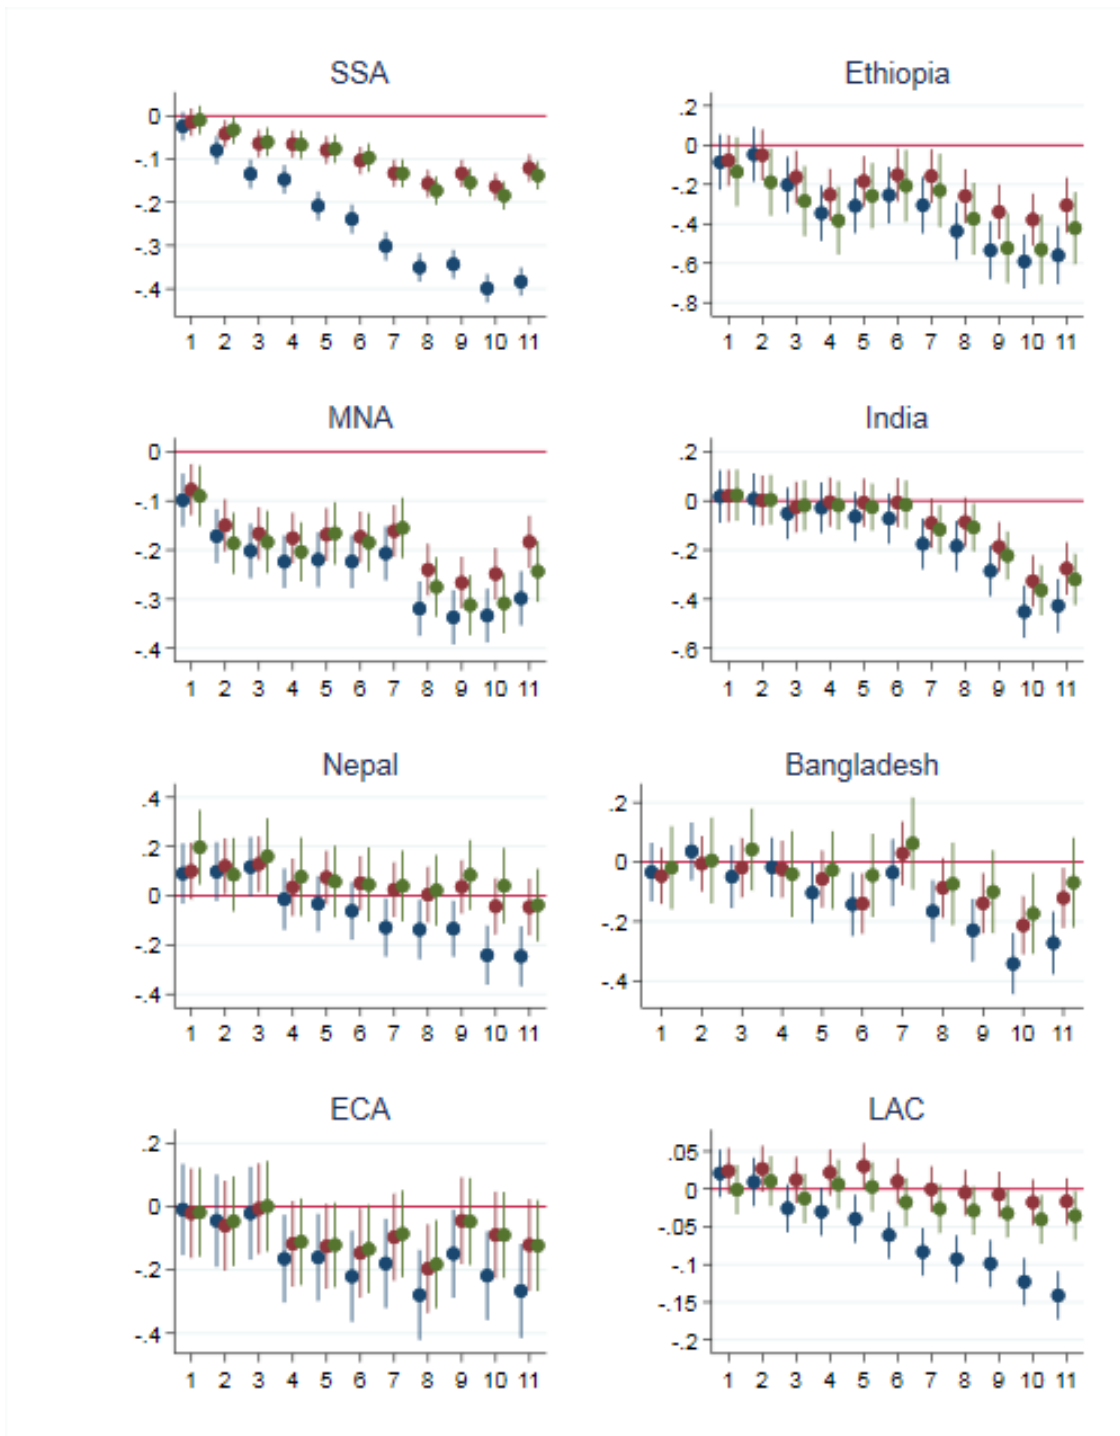

Source: DHS data for 960,012 children from 58 countries, various years.

Note: HAZ = height-for-age z-scores. SSA = Africa south of the Sahara; MNA = Middle East and North Africa; ECA = Eastern Europe and Central Asia; LAC = Latin America and Caribbean. The graphs present coefficients to MOB dummies from three regressions: raw means (in blue); controlling for child demographics and survey fixed effects (red); and also controlling for parental and household characteristics (green). Regression results are available upon request.

**Figure A.15 Separate and joint tests for month-of-birth and round age biases in stunting status, with alternative sets of control variables**

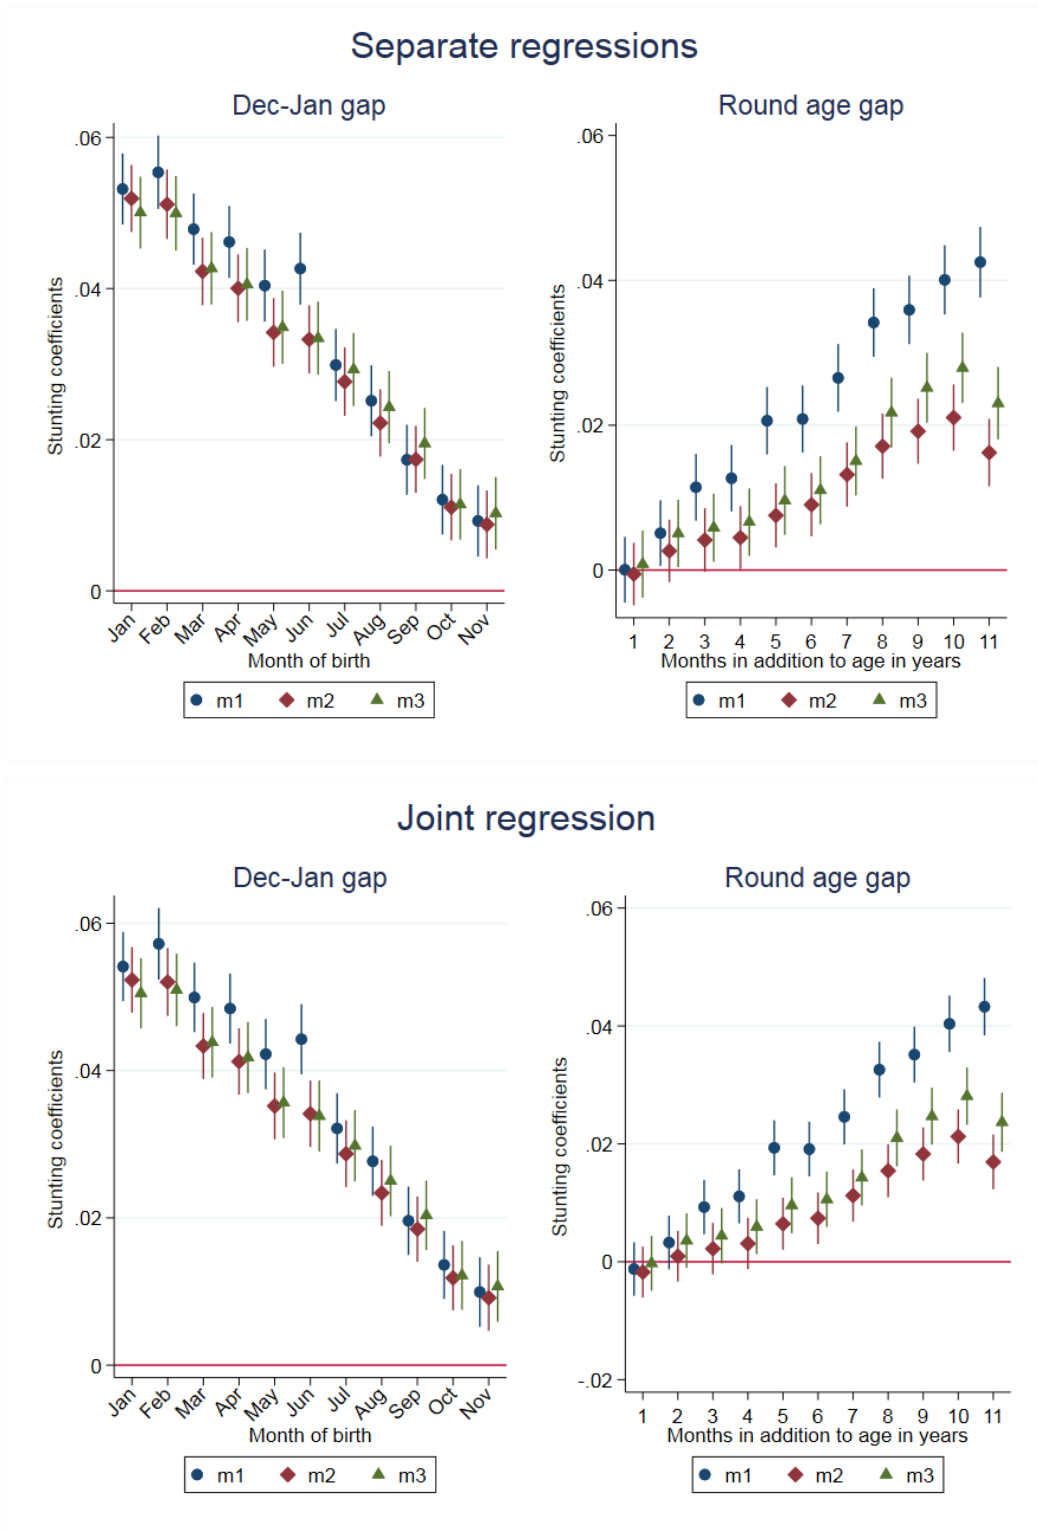

Source: DHS data for 990,231 children from 62 countries, various years.

Note: Results shown are as for Figure 8 in the main text, but for stunting status instead of mean HAZ. Regression results are available upon request.



## **B: Simulation protocol and additional results**

### **Data-generating process**

To simulate the true underlying height data, we implement the following data-generating process. We use Stata 14 for the simulations with the seed 1159 for the random number generator.

1. The observations consist of 100 girls born on each day between January 1, 2010, to December 31, 2015 (219,100 observations in total).
2. Assign a random day of measurement for each observation within the time span January 1, 2015, to December 31, 2015.
3. Calculate the true age (in days) as the difference between the birth date and the day of measurement. This leads to an age range from almost  $-1$  year to 6 years of age. The reason to include children with ages greater than five years is that the measurement error in age may cause children to be included in the sample who are truly too old to be included. We disregard children with negative age (that is, born later than the day of measurement, 18,333 observations). Furthermore, we mirror the increasing attrition with age that we see in the DHS data by dropping a number of observations that increase linearly with age up to 24 percent for those 58 months old as found in the DHS data. Now, the total number of observations is 175,030.
4. Merge the data with age-specific synthetic length/height medians and standard deviations (SDs). These are constructed the following way:
  - a) We use World Health Organization (WHO) length/height medians and SDs by age in days for girls as a starting point (WHO MGRSG 2006). These are available up to 1,856 days of age. For older children, WHO provides means and SDs by age in months (de Onis et al. 2007). We make a linear interpolation to obtain means and SDs by age in days for children older than 1,856 days.
  - b) The WHO reference data are based on well-nourished children. To illustrate the measurement error in an environment with a plausible amount of stunting, we adjust the medians and SDs to correspond in a smooth way to the empirical pattern from the DHS data.
  - c) The height medians are adjusted by changing the growth velocities such that children up to six months grow 7 percent less each day than well-nourished children; children from six months to two years of age grow 21 percent less each day than the growth standards; and children older than two years grow 10 percent less each day than the growth standards. Figure B.1 illustrates how these adjustments calibrate the synthetic mean heights well to the DHS mean heights.
  - d) We add 2 to the height SDs to account for overall measurement error and increased dispersion due to variation in nutritional status of the children in the sample. In the DHS data, the SDs of height increase less with age than the WHO SDs, so we multiply the WHO SDs with 0.85 to have the same age gradient in the synthetic data as in the DHS data. Figure B.2 illustrates the SDs of heights by age in days in the DHS data and in the simulated data. We chose SDs that are below the SDs in the DHS data to better fit the overall and severe stunting rates of the simulated data with the stunting rates in the DHS data.

1. Draw heights for each observation from a normal distribution using the synthetic medians and SDs.
2. Calculate the true HAZ based on the simulated data for the children who are younger than 1,826 days (five years). Figure B.3 illustrates how the simulated true HAZ compares to the HAZ in the DHS data.

**Figure B.1 Mean height by age (local polynomial smoothing), DHS data and simulated data**

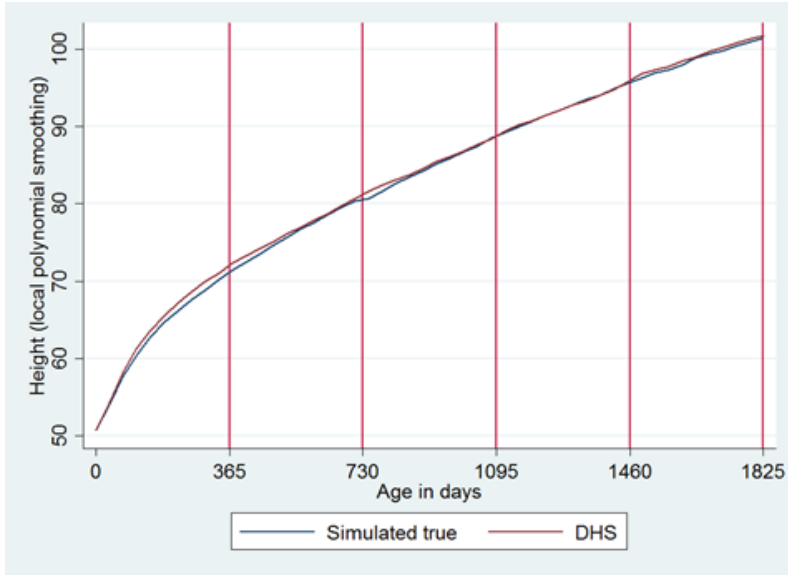

Source: Simulated data and DHS data for 960,012 children from 58 countries, various years.

Note: DHS = Demographic and Health Surveys.

**Figure B.2 Standard deviation of height by age (local polynomial smoothing), DHS and simulated data**

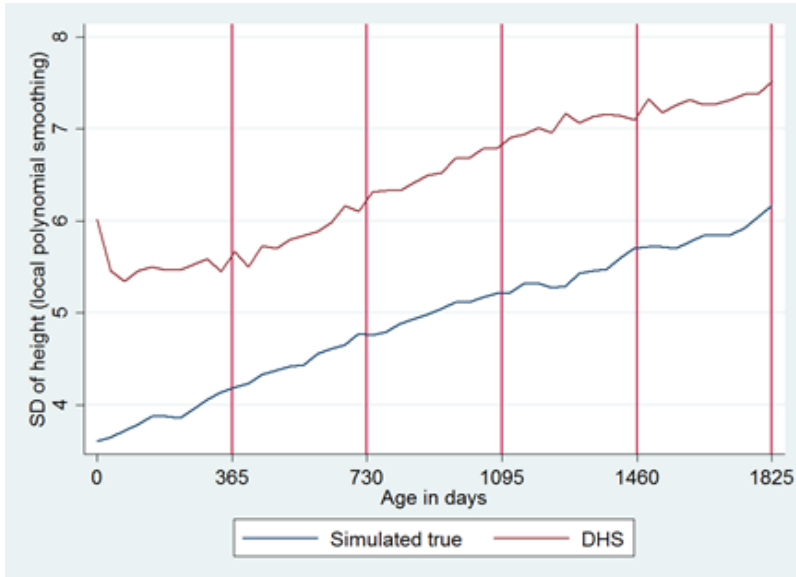

Source: Simulated data and DHS data for 960,012 children from 58 countries, various years.

Note: DHS = Demographic and Health Surveys.

**Figure B.3 Mean HAZ by age (local polynomial smoothing), DHS and simulated data**

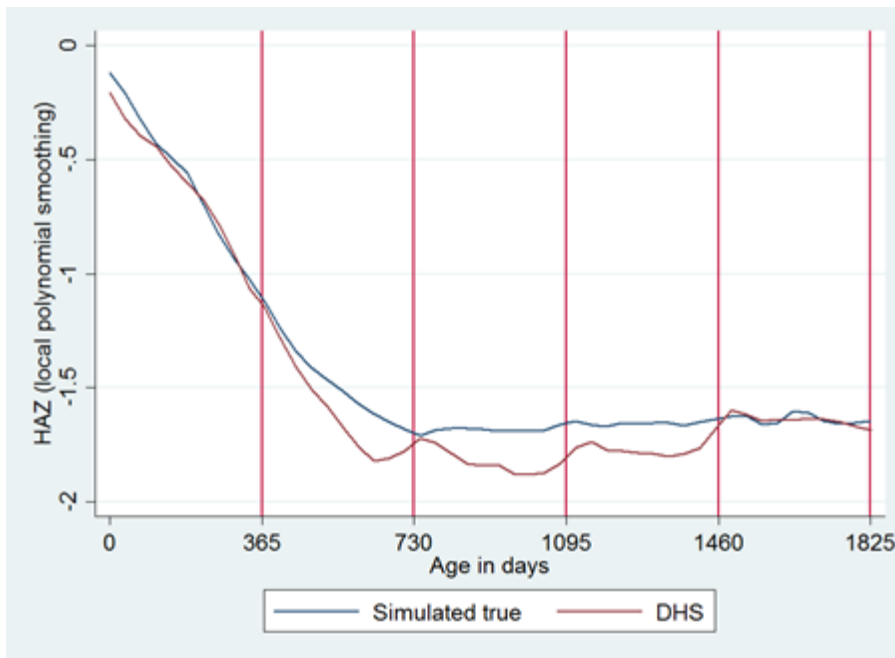

Source: Simulated data and DHS data for 960,012 children from 58 countries, various years.

Note: DHS = Demographic and Health Surveys.

### **Introducing measurement error: Random month of birth**

To illustrate how measurement error in the month of birth can lead to a discontinuity in mean HAZ between December and January and to quantify the impact on stunting rates, we simulate the random month measurement error in the following way:

1. Draw random day and month of birth for each observation from a uniform distribution and calculate reported age based on the random day and month and the true birth year. For children born in 2015, the random month is restricted such that they cannot draw a random month of birth after the month of measurement.
2. Calculate the HAZ with random month of birth error for the children with a reported age below 1,826 days (five years).
3. Show how HAZ with error exhibits qualitatively the same pattern over month of birth as in the DHS data. This is illustrated in Figure B.4.
4. Randomly assign whether a child has measurement error in month of birth or not. We vary the share of children with measurement error to find the share that matches the December–January gap in the simulated mean HAZ with the corresponding gap in the DHS data. This is shown in Figure B.5 and Table B.1.
5. Calculate overall and severe stunting rates for simulated data with varying shares of measurement error in month of birth. These are also included in Table B.1.

**Figure B.4 Simulated HAZ by calendar month with and without random months**

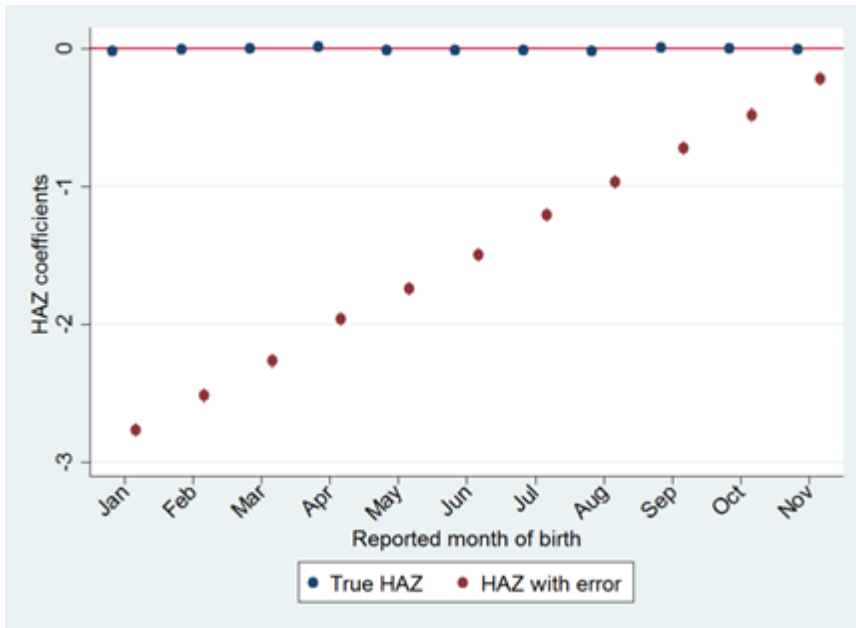

Source: Simulated data and DHS data for 960,012 children from 58 countries, various years.

Note: DHS = Demographic and Health Surveys.

**Figure B.5 Simulated HAZ by calendar month at each share of children with random months**

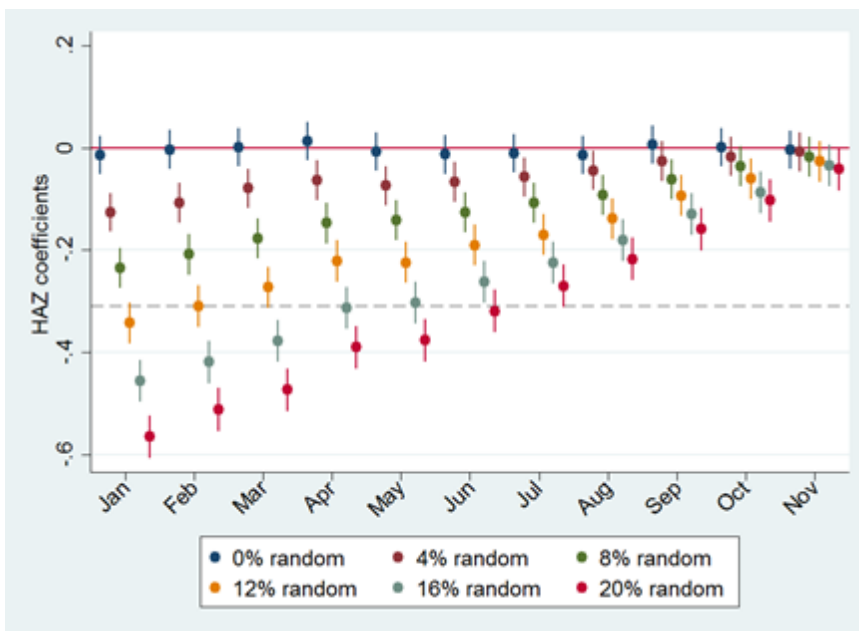

Source: Simulated data.

Note: HAZ = height-for-age z-scores. Dashed line represents December-January gap in DHS data.

**Table B.1 Simulated December–January gap and stunting rates by share with random month**

| Share random | Dec–Jan gap   | Overall stunting (<-2) |               | Severe stunting (<-3) |               |
|--------------|---------------|------------------------|---------------|-----------------------|---------------|
| <i>DHS</i>   | <i>-0.313</i> | <i>0.354</i>           |               | <i>0.16</i>           |               |
|              |               | Rate                   | Difference    | Rate                  | Difference    |
| <b>0.00</b>  | <b>-0.014</b> | <b>0.352</b>           | -             | <b>0.145</b>          | -             |
| 0.01         | -0.038        | 0.353                  | +0.001        | 0.146                 | +0.001        |
| 0.02         | -0.064        | 0.354                  | +0.002        | 0.147                 | +0.002        |
| 0.03         | -0.095        | 0.354                  | +0.002        | 0.147                 | +0.002        |
| 0.04         | -0.126        | 0.355                  | +0.003        | 0.148                 | +0.003        |
| 0.05         | -0.155        | 0.355                  | +0.003        | 0.148                 | +0.003        |
| 0.06         | -0.181        | 0.355                  | +0.003        | 0.149                 | +0.004        |
| 0.07         | -0.209        | 0.356                  | +0.004        | 0.149                 | +0.004        |
| 0.08         | -0.235        | 0.356                  | +0.004        | 0.150                 | +0.005        |
| 0.09         | -0.259        | 0.356                  | +0.004        | 0.150                 | +0.005        |
| 0.10         | -0.287        | 0.357                  | +0.005        | 0.151                 | +0.006        |
| <b>0.11</b>  | <b>-0.320</b> | <b>0.357</b>           | <b>+0.005</b> | <b>0.152</b>          | <b>+0.007</b> |
| 0.12         | -0.343        | 0.358                  | +0.006        | 0.153                 | +0.008        |
| 0.13         | -0.368        | 0.358                  | +0.006        | 0.153                 | +0.008        |
| 0.14         | -0.402        | 0.359                  | +0.007        | 0.154                 | +0.009        |
| 0.15         | -0.428        | 0.359                  | +0.007        | 0.155                 | +0.010        |
| 0.16         | -0.456        | 0.359                  | +0.007        | 0.155                 | +0.010        |
| 0.17         | -0.483        | 0.360                  | +0.008        | 0.156                 | +0.011        |
| 0.18         | -0.511        | 0.360                  | +0.008        | 0.156                 | +0.011        |
| 0.19         | -0.539        | 0.360                  | +0.008        | 0.157                 | +0.012        |
| 0.20         | -0.565        | 0.361                  | +0.009        | 0.158                 | +0.013        |
| 0.21         | -0.592        | 0.361                  | +0.009        | 0.158                 | +0.013        |
| 0.22         | -0.620        | 0.362                  | +0.010        | 0.159                 | +0.014        |
| 0.23         | -0.649        | 0.362                  | +0.010        | 0.160                 | +0.015        |
| 0.24         | -0.680        | 0.362                  | +0.010        | 0.160                 | +0.015        |
| 0.25         | -0.707        | 0.363                  | +0.011        | 0.161                 | +0.016        |
| 0.26         | -0.759        | 0.362                  | +0.010        | 0.162                 | +0.017        |
| 0.27         | -0.789        | 0.363                  | +0.011        | 0.162                 | +0.017        |
| 0.28         | -0.811        | 0.363                  | +0.011        | 0.163                 | +0.018        |
| 0.29         | -0.841        | 0.364                  | +0.012        | 0.164                 | +0.019        |
| 0.30         | -0.870        | 0.364                  | +0.012        | 0.164                 | +0.019        |
| 0.31         | -0.899        | 0.365                  | +0.013        | 0.165                 | +0.020        |
| 0.32         | -0.932        | 0.365                  | +0.013        | 0.166                 | +0.021        |
| 0.33         | -0.957        | 0.365                  | +0.013        | 0.166                 | +0.021        |
| 0.34         | -0.985        | 0.366                  | +0.014        | 0.167                 | +0.022        |
| 0.35         | -1.013        | 0.366                  | +0.014        | 0.168                 | +0.023        |
| 0.36         | -1.038        | 0.366                  | +0.014        | 0.168                 | +0.023        |
| 0.37         | -1.073        | 0.367                  | +0.015        | 0.169                 | +0.024        |

| --continued-- |             |                        |            |                       |            |
|---------------|-------------|------------------------|------------|-----------------------|------------|
| Share random  | Dec-Jan gap | Overall stunting (<-2) |            | Severe stunting (<-2) |            |
|               |             | Rate                   | Difference | Rate                  | Difference |
| 0.38          | -1.104      | 0.367                  | +0.015     | 0.169                 | +0.024     |
| 0.39          | -1.133      | 0.367                  | +0.015     | 0.170                 | +0.025     |
| 0.40          | -1.163      | 0.368                  | +0.016     | 0.171                 | +0.026     |
| 0.41          | -1.192      | 0.368                  | +0.016     | 0.171                 | +0.026     |
| 0.42          | -1.217      | 0.369                  | +0.017     | 0.172                 | +0.027     |
| 0.43          | -1.238      | 0.369                  | +0.017     | 0.172                 | +0.027     |
| 0.44          | -1.260      | 0.369                  | +0.017     | 0.173                 | +0.028     |
| 0.45          | -1.286      | 0.370                  | +0.018     | 0.174                 | +0.029     |
| 0.46          | -1.309      | 0.370                  | +0.018     | 0.174                 | +0.029     |
| 0.47          | -1.340      | 0.371                  | +0.019     | 0.175                 | +0.030     |
| 0.48          | -1.362      | 0.371                  | +0.019     | 0.175                 | +0.030     |
| 0.49          | -1.390      | 0.371                  | +0.019     | 0.176                 | +0.031     |
| 0.50          | -1.417      | 0.372                  | +0.020     | 0.176                 | +0.031     |

Source: Simulated data.

Note: HAZ = height-for-age z-scores.

**Table B.2 Actual December–January gaps, SD of HAZ and estimated share of children with random birthdays for 163 Demographic Health Surveys**

| Country          | Year(s) | Phase | N     | Dec-Jan gap | SD of HAZ | Share random |
|------------------|---------|-------|-------|-------------|-----------|--------------|
| Armenia          | 2000    | 4     | 1539  | -0.42       | 1.47      | 0.14         |
| Armenia          | 2005    | 5     | 1300  | 0.06        | 2.14      | 0.00         |
| Albania          | 2008-09 | 5     | 1523  | -1.08       | 2.88      | 0.37         |
| Armenia          | 2010    | 6     | 1406  | 0.12        | 2.04      | 0.00         |
| Azerbaijan       | 2006    | 5     | 2089  | -0.06       | 2.09      | 0.02         |
| Bangladesh       | 1999-00 | 4     | 5530  | -0.14       | 1.85      | 0.05         |
| Bangladesh       | 1996-97 | 3     | 5091  | -0.42       | 2.31      | 0.14         |
| Bangladesh       | 2004    | 4     | 6050  | -0.06       | 1.57      | 0.02         |
| Bangladesh       | 2007    | 5     | 5399  | 0.09        | 1.61      | 0.00         |
| Bangladesh       | 2011    | 6     | 7867  | -0.22       | 1.80      | 0.08         |
| Benin            | 2001    | 4     | 4521  | -0.08       | 1.92      | 0.03         |
| Benin            | 2006    | 5     | 13431 | -0.33       | 2.48      | 0.11         |
| Benin            | 2011-12 | 6     | 11420 | -0.76       | 3.25      | 0.26         |
| Bolivia          | 1998    | 3     | 6376  | -0.34       | 2.02      | 0.12         |
| Bolivia          | 2003    | 4     | 9334  | -0.11       | 1.67      | 0.04         |
| Bolivia          | 2008    | 5     | 7817  | -0.09       | 1.47      | 0.03         |
| Brazil           | 1996    | 3     | 4178  | -0.09       | 1.70      | 0.03         |
| Burkina Faso     | 1998-99 | 3     | 4763  | -0.45       | 2.09      | 0.15         |
| Burkina Faso     | 1993    | 2     | 4579  | -0.43       | 2.12      | 0.15         |
| Burkina Faso     | 2003    | 4     | 8795  | 0.00        | 2.30      | 0.00         |
| Burkina Faso     | 2010    | 6     | 6728  | -0.48       | 1.80      | 0.17         |
| Burundi          | 2010    | 6     | 3494  | -0.48       | 1.53      | 0.17         |
| Cambodia         | 2000    | 4     | 3776  | -0.68       | 2.07      | 0.24         |
| Cambodia         | 2005    | 5     | 3682  | -0.42       | 1.69      | 0.15         |
| Cambodia         | 2010    | 6     | 3807  | -0.13       | 1.75      | 0.04         |
| Cameroon         | 2004    | 4     | 3336  | -0.08       | 2.05      | 0.03         |
| Cameroon         | 2011    | 6     | 5188  | -0.51       | 1.92      | 0.18         |
| Chad             | 2004    | 4     | 4656  | -0.29       | 2.28      | 0.10         |
| Colombia         | 1995    | 3     | 4561  | -0.03       | 1.27      | 0.01         |
| Colombia         | 2000    | 4     | 4226  | 0.03        | 1.21      | 0.00         |
| Colombia         | 2005    | 5     | 12480 | -0.01       | 1.21      | 0.00         |
| Colombia         | 2010    | 6     | 16041 | 0.01        | 1.16      | 0.00         |
| Comoros          | 2012    | 6     | 2711  | -0.65       | 2.90      | 0.22         |
| Congo, Dem. Rep. | 2007    | 5     | 3657  | -0.48       | 3.06      | 0.17         |
| Congo, Dem. Rep. | 2013-14 | 6     | 8398  | -0.72       | 2.16      | 0.25         |
| Congo, Rep.      | 2005    | 5     | 4062  | -0.40       | 2.10      | 0.14         |
| Congo, Rep.      | 2011-12 | 6     | 4531  | -0.68       | 1.60      | 0.23         |
| Cote d'Ivoire    | 1998-99 | 3     | 1592  | -0.37       | 1.78      | 0.13         |
| Cote d'Ivoire    | 2011-12 | 6     | 3297  | -0.48       | 2.02      | 0.16         |

---

--continued--

---

| Country        | Year(s) | Phase | N     | Dec-Jan gap | SD of HAZ | Share random |
|----------------|---------|-------|-------|-------------|-----------|--------------|
| Dominican Rep. | 1996    | 3     | 3810  | -0.23       | 1.57      | 0.08         |
| Dominican Rep. | 2002    | 4     | 9447  | -0.28       | 1.51      | 0.10         |
| Dominican Rep. | 2007    | 5     | 9489  | -0.23       | 1.54      | 0.08         |
| Dominican Rep. | 2013    | 6     | 3238  | -0.13       | 1.37      | 0.04         |
| Egypt          | 1992    | 2     | 7706  | -0.47       | 1.97      | 0.16         |
| Egypt          | 1995    | 3     | 10839 | -0.70       | 2.05      | 0.24         |
| Egypt          | 2000    | 4     | 10721 | -0.34       | 1.85      | 0.12         |
| Egypt          | 2003    | 4     | 6247  | -0.17       | 1.58      | 0.06         |
| Egypt          | 2005    | 5     | 13175 | -0.21       | 2.26      | 0.07         |
| Egypt          | 2008    | 5     | 10469 | -0.25       | 2.60      | 0.09         |
| Egypt          | 2014    | 6     | 15189 | -0.65       | 2.72      | 0.23         |
| Ethiopia       | 2000    | 4     | 9066  | -0.21       | 1.98      | 0.07         |
| Ethiopia       | 2005    | 5     | 4195  | -0.55       | 2.59      | 0.19         |
| Ethiopia       | 2011    | 6     | 9886  | -0.41       | 2.05      | 0.14         |
| Gabon          | 2000    | 4     | 3572  | -0.45       | 1.72      | 0.16         |
| Gabon          | 2012    | 6     | 3490  | -0.49       | 2.02      | 0.17         |
| Ghana          | 1998    | 4     | 2838  | -0.20       | 1.95      | 0.07         |
| Ghana          | 2003    | 4     | 3200  | -0.20       | 1.95      | 0.07         |
| Ghana          | 2008    | 5     | 2526  | -0.08       | 2.36      | 0.03         |
| Guatemala      | 1995    | 3     | 8794  | -0.13       | 1.61      | 0.04         |
| Guatemala      | 1998-99 | 4     | 4026  | -0.08       | 1.70      | 0.03         |
| Guinea         | 1999    | 4     | 4625  | -0.62       | 2.39      | 0.22         |
| Guinea         | 2005    | 5     | 2754  | -0.08       | 2.09      | 0.03         |
| Guinea         | 2012    | 6     | 3221  | -0.24       | 2.08      | 0.09         |
| Guyana         | 2009    | 5     | 1707  | -0.76       | 2.36      | 0.26         |
| Haiti          | 2000    | 4     | 5628  | -0.35       | 1.59      | 0.12         |
| Haiti          | 2005-06 | 5     | 2597  | -0.24       | 1.56      | 0.08         |
| Haiti          | 2012    | 6     | 4042  | -0.49       | 1.54      | 0.17         |
| Honduras       | 2005-06 | 5     | 9043  | -0.12       | 1.48      | 0.04         |
| Honduras       | 2011-12 | 6     | 10014 | 0.04        | 1.26      | 0.00         |
| India          | 2005-06 | 5     | 43656 | -0.26       | 2.13      | 0.09         |
| Jordan         | 1990    | 2     | 6888  | -0.05       | 1.83      | 0.02         |
| Jordan         | 1997    | 3     | 5675  | -0.16       | 1.37      | 0.05         |
| Jordan         | 2002    | 4     | 4935  | -0.17       | 1.32      | 0.06         |
| Jordan         | 2007    | 5     | 4769  | -0.47       | 2.47      | 0.16         |
| Jordan         | 2009    | 6     | 4429  | -0.20       | 1.47      | 0.07         |
| Jordan         | 2012    | 6     | 6355  | -0.05       | 1.52      | 0.02         |
| Kazakhstan     | 1999    | 4     | 580   | 0.02        | 1.49      | 0.00         |
| Kenya          | 1993    | 3     | 5084  | -0.50       | 1.87      | 0.17         |
| Kenya          | 1998    | 3     | 4815  | -0.34       | 2.23      | 0.12         |
| Kenya          | 2003    | 4     | 4879  | -0.17       | 1.98      | 0.06         |



--continued--

| Country         | Year(s) | Phase | N     | Dec-Jan gap | SD of HAZ | Share random |
|-----------------|---------|-------|-------|-------------|-----------|--------------|
| Kenya           | 2008-09 | 5     | 5340  | -0.38       | 2.19      | 0.13         |
| Kyrgyz Republic | 2012    | 6     | 4068  | -0.34       | 1.53      | 0.12         |
| Lesotho         | 2004    | 4     | 1465  | -0.31       | 2.24      | 0.11         |
| Lesotho         | 2009    | 6     | 1675  | 0.33        | 2.18      | 0.00         |
| Liberia         | 2007    | 5     | 4566  | -0.24       | 2.37      | 0.08         |
| Liberia         | 2013    | 6     | 3262  | -0.45       | 1.93      | 0.15         |
| Madagascar      | 1992    | 2     | 4228  | -0.14       | 1.58      | 0.05         |
| Madagascar      | 2003-04 | 4     | 4738  | -0.47       | 2.15      | 0.16         |
| Madagascar      | 2008-09 | 5     | 5534  | -0.18       | 2.57      | 0.06         |
| Malawi          | 1992    | 2     | 3361  | -0.34       | 1.78      | 0.12         |
| Malawi          | 2000    | 4     | 9744  | -0.42       | 2.25      | 0.14         |
| Malawi          | 2004    | 4     | 8686  | -0.43       | 2.34      | 0.15         |
| Malawi          | 2010    | 6     | 4843  | -0.27       | 2.13      | 0.10         |
| Maldives        | 2009    | 5     | 2451  | -0.10       | 1.86      | 0.03         |
| Mali            | 2006    | 5     | 11643 | -0.44       | 2.35      | 0.15         |
| Mali            | 2012-13 | 6     | 4600  | -1.16       | 2.44      | 0.41         |
| Moldova         | 2005    | 5     | 1381  | -0.41       | 2.21      | 0.14         |
| Morocco         | 1992    | 2     | 4652  | -0.14       | 1.80      | 0.05         |
| Morocco         | 2003-04 | 4     | 5680  | -0.32       | 2.15      | 0.11         |
| Mozambique      | 2003    | 4     | 8288  | -0.52       | 1.77      | 0.18         |
| Mozambique      | 2011    | 6     | 9721  | -0.46       | 1.93      | 0.16         |
| Namibia         | 1992    | 2     | 2768  | -0.05       | 1.87      | 0.02         |
| Namibia         | 2000    | 4     | 3038  | -0.40       | 1.84      | 0.14         |
| Namibia         | 2006-07 | 5     | 3846  | -0.30       | 2.01      | 0.10         |
| Namibia         | 2013    | 6     | 1880  | -0.49       | 2.39      | 0.17         |
| Nepal           | 2001    | 4     | 6252  | -0.07       | 1.42      | 0.02         |
| Nepal           | 2006    | 5     | 5283  | 0.05        | 1.39      | 0.00         |
| Nepal           | 2011    | 6     | 2360  | -0.18       | 1.55      | 0.06         |
| Nicaragua       | 1998    | 3     | 7168  | -0.39       | 1.98      | 0.14         |
| Nicaragua       | 2001    | 4     | 6103  | 0.18        | 1.82      | 0.00         |
| Niger           | 2006    | 5     | 3869  | -0.26       | 2.09      | 0.09         |
| Niger           | 2012    | 6     | 5153  | -0.25       | 2.53      | 0.09         |
| Nigeria         | 1990    | 2     | 6150  | -0.62       | 2.27      | 0.22         |
| Nigeria         | 2003    | 4     | 4793  | -0.84       | 2.63      | 0.29         |
| Nigeria         | 2008    | 5     | 23123 | -0.90       | 3.44      | 0.31         |
| Nigeria         | 2013    | 6     | 26827 | -0.69       | 2.74      | 0.24         |
| Pakistan        | 1990-91 | 2     | 4681  | -0.26       | 2.36      | 0.09         |
| Pakistan        | 2012-13 | 6     | 3640  | -0.38       | 3.12      | 0.13         |
| Paraguay        | 1990    | 2     | 3682  | -0.14       | 1.42      | 0.05         |
| Peru            | 1991-92 | 2     | 7870  | -0.30       | 1.63      | 0.10         |
| Peru            | 1996    | 3     | 15259 | -0.29       | 1.72      | 0.10         |

---

--continued--

---

| Country             | Year(s) | Phase | N     | Dec-Jan gap | SD of HAZ | Share random |
|---------------------|---------|-------|-------|-------------|-----------|--------------|
| Peru                | 2000    | 4     | 11795 | -0.23       | 1.52      | 0.08         |
| Peru                | 2003-08 | 5     | 10494 | -0.03       | 1.26      | 0.01         |
| Peru                | 2009    | 5     | 9406  | -0.09       | 1.19      | 0.03         |
| Peru                | 2010    | 6     | 8804  | 0.16        | 1.15      | 0.00         |
| Peru                | 2011    | 6     | 8753  | 0.03        | 1.11      | 0.00         |
| Peru                | 2012    | 6     | 8893  | -0.17       | 1.09      | 0.06         |
| Rwanda              | 1992    | 2     | 4415  | -0.17       | 1.72      | 0.06         |
| Rwanda              | 2000    | 4     | 6380  | -0.51       | 2.17      | 0.18         |
| Rwanda              | 2005    | 5     | 3786  | -0.06       | 1.95      | 0.02         |
| Rwanda              | 2010    | 6     | 4122  | -0.15       | 1.47      | 0.05         |
| Sao Tome & Principe | 2008-09 | 5     | 1706  | -0.77       | 2.80      | 0.27         |
| Senegal             | 1992-93 | 2     | 4665  | -0.21       | 1.90      | 0.07         |
| Senegal             | 2005    | 4     | 2936  | -0.10       | 1.79      | 0.03         |
| Senegal             | 2010-11 | 6     | 3929  | -0.44       | 2.41      | 0.15         |
| Senegal             | 2012-13 | 6     | 6070  | -0.17       | 1.80      | 0.06         |
| Senegal             | 2014    | 7     | 6110  | -0.01       | 1.65      | 0.00         |
| Sierra Leone        | 2008    | 5     | 2285  | -0.98       | 2.60      | 0.34         |
| Sierra Leone        | 2013    | 6     | 4729  | -0.76       | 3.44      | 0.26         |
| Swaziland           | 2006-07 | 5     | 2106  | -0.12       | 1.80      | 0.04         |
| Tajikistan          | 2012    | 6     | 4767  | -0.50       | 2.05      | 0.17         |
| Tanzania            | 1991-92 | 2     | 6742  | -0.23       | 1.98      | 0.08         |
| Tanzania            | 1996    | 3     | 5576  | -0.29       | 2.01      | 0.10         |
| Tanzania            | 1999    | 4     | 2584  | -0.10       | 1.62      | 0.04         |
| Tanzania            | 2004-05 | 4     | 7303  | -0.24       | 1.54      | 0.09         |
| Tanzania            | 2010    | 6     | 6955  | -0.19       | 1.75      | 0.07         |
| Timor-Leste         | 2009-10 | 6     | 8182  | -1.03       | 2.49      | 0.36         |
| Turkey              | 1993    | 3     | 3187  | -0.29       | 1.62      | 0.10         |
| Turkey              | 1998    | 4     | 2845  | -0.24       | 1.58      | 0.08         |
| Turkey              | 2003    | 4     | 4074  | 0.04        | 1.52      | 0.00         |
| Uganda              | 2000-01 | 4     | 5270  | -0.18       | 1.75      | 0.06         |
| Uganda              | 2006    | 5     | 2421  | -0.28       | 1.89      | 0.10         |
| Uganda              | 2011    | 6     | 2108  | -0.12       | 1.71      | 0.04         |
| Yemen               | 1991-92 | 2     | 2959  | -1.04       | 1.69      | 0.36         |
| Yemen               | 2013    | 6     | 14287 | -0.56       | 2.00      | 0.20         |
| Zambia              | 1992    | 2     | 5084  | -0.36       | 1.73      | 0.13         |
| Zambia              | 1996    | 3     | 5678  | -0.34       | 1.80      | 0.12         |
| Zambia              | 2001-02 | 4     | 5643  | -0.26       | 1.97      | 0.09         |
| Zambia              | 2007    | 5     | 5391  | -0.38       | 2.22      | 0.13         |
| Zambia              | 2013-14 | 6     | 11799 | -0.46       | 1.88      | 0.16         |
| Zimbabwe            | 1999    | 4     | 2848  | -0.14       | 2.45      | 0.05         |
| Zimbabwe            | 2005-06 | 5     | 4211  | 0.21        | 2.29      | 0.00         |

---

--continued--

---

| <b>Country</b> | <b>Year(s)</b> | <b>Phase</b> | <b>N</b> | <b>Dec-Jan gap</b> | <b>SD of HAZ</b> | <b>Share random</b> |
|----------------|----------------|--------------|----------|--------------------|------------------|---------------------|
| Zimbabwe       | 2010-11        | 6            | 4412     | -0.36              | 1.70             | 0.12                |

---

Notes: Phase refers to the DHS phase. N refers to the number of observations; Dec-Jan gap refers to the Dec-Jan Gap in HAZ scores based on MOB; SD refers to the standard deviation of HAZ; and share random refers to the estimated share of the children who may have a purely random MOB.
